# Supplementary material for: Novel 4′-functionalized 4,4′′-dicarboxyterpyridine ligands for ruthenium complexes: near-IR sensitization in dye sensitized solar cells
Source: Royal Society of Chemistry journal article supplement (doi:10.1039/c4dt01598c), 2014-01-01

## Novel 4'- Functionalized 4, 4''-Dicarboxyterpyridine Ligands for Ruthenium Complexes: Near-IR Sensitization in Dye Sensitized Solar Cells.

Ganesh Koyyada<sup>a,b</sup>, Vinayak Botla<sup>a</sup>, Suresh Thogiti<sup>a</sup>, Guohua Wu<sup>c</sup>, Jingzhe Li<sup>c</sup>, Xiaqin Fang<sup>c</sup>,  
Fantai Kong<sup>\*c</sup>, Songyuan Dai<sup>c,d</sup>, Niveditha Surukonti<sup>a</sup>, Bhanuprakash Kotamarthi<sup>a,b</sup>,  
Chandrasekharam Malapaka<sup>\*a,b</sup>

<sup>a</sup>Network of institutes for solar energy, CSIR-Indian Institute of Chemical Technology, I&PC Division, Uppal Road, Tarnaka, Hyderabad-500 607, India.

<sup>b</sup>Academy of Scientific and Innovative Research, CSIR-IICT.

<sup>c</sup>Key Laboratory of Novel Thin Film Solar Cells, Institute of Plasma Physics, Chinese Academy of Sciences, Hefei, 230031, P. R. China

<sup>d</sup>State Key Laboratory of Alternate Electrical Power System with Renewable Energy Sources, North China Electric Power University, Beijing, 102206, P. R. China

E-mail: [Chandra@iict.res.in](mailto:Chandra@iict.res.in) Phone Fax : +00914027193186.

### Table of content:

**Table S1.** Dihedral angles of **MC113-MC117** calculated at PBE0/LANL2DZ level, level of theory.

**Table S2.** Experimental  $\lambda_{\max}$ , calculated excitation energies (eV),  $\lambda$  (nm) and oscillator strengths (f) and orbitals contribution to corresponding excited states, of **MC113-MC117** in DMF solvent, calculated at M06/LANL2DZ level.

**Fig. S1.** Chemical structures of the new sensitizers **MC113-MC117**, and **N749**.

**Fig. S2.** Structures of optimized geometries of **MC113-MC117** at PBE0/ LANL2DZ level, in gas phase

**Fig. S3. (S1.a-S1.e)** Isodensity plots of **MC113-MC117** (isovalue=0.02) in DMF, with percentage contribution of groups to each molecular orbital, calculated at M06/LANL2DZ level.

**Fig. S4.** Normalized plots of simulated and experimental UV-Vis spectra of **MC113-MC117**. The green vertical bars correspond to the Oscillator strengths of calculated singlet excited states.

**Table S1.** Dihedral angles of **MC113-117** calculated at PBE0/LANL2DZ level, level of theory.

| <b>Dihedral angles (°)</b> |                                                                    |               |
|----------------------------|--------------------------------------------------------------------|---------------|
| MC113                      | C <sub>46</sub> -C <sub>45</sub> -C <sub>26</sub> -C <sub>27</sub> | <i>-144.4</i> |
| MC114                      | C <sub>69</sub> -C <sub>68</sub> -C <sub>26</sub> -C <sub>27</sub> | <i>147.9</i>  |
| MC115                      | C <sub>46</sub> -C <sub>45</sub> -C <sub>26</sub> -C <sub>27</sub> | <i>-166.8</i> |
|                            | S <sub>47</sub> -C <sub>45</sub> -C <sub>26</sub> -C <sub>24</sub> | <i>-166.7</i> |
|                            | S <sub>54</sub> -C <sub>52</sub> -C <sub>50</sub> -S <sub>47</sub> | <i>-179.7</i> |
| MC116                      | C <sub>46</sub> -C <sub>44</sub> -C <sub>68</sub> -C <sub>24</sub> | <i>147.9</i>  |
|                            | N <sub>63</sub> -C <sub>51</sub> -C <sub>47</sub> -C <sub>45</sub> | <i>178.4</i>  |
|                            | O <sub>69</sub> -C <sub>47</sub> -C <sub>45</sub> -C <sub>44</sub> | <i>177.7</i>  |
| MC117                      | C <sub>45</sub> -C <sub>44</sub> -C <sub>69</sub> -C <sub>26</sub> | <i>145.6</i>  |
|                            | S <sub>63</sub> -C <sub>47</sub> -C <sub>45</sub> -C <sub>44</sub> | <i>173.5</i>  |
|                            | N <sub>64</sub> -C <sub>51</sub> -C <sub>49</sub> -C <sub>46</sub> | <i>-179.3</i> |

**Table S2.** Experimental  $\lambda_{\max}$ , calculated excitation energies (eV),  $\lambda$  (nm) and oscillator strengths (f) and orbitals contribution to corresponding excited states, of **MC113-MC117** in DMF solvent, calculated at M06/LANL2DZ level

|                                                                                       | $\lambda_{\text{exp}}$<br>(nm) | $\lambda_{\text{cal}}$ (nm) | State | f      | Energy (eV) | Major contribution (%)*                                 |
|---------------------------------------------------------------------------------------|--------------------------------|-----------------------------|-------|--------|-------------|---------------------------------------------------------|
| <b>MC113</b>                                                                          | 632                            | 816                         | S1    | 0.0554 | 1.51        | H-1->LUMO (85%)                                         |
|                                                                                       |                                | 657                         | S4    | 0.1274 | 1.88        | HOMO->L+1 (89%)                                         |
|                                                                                       |                                | 485                         | S8    | 0.1081 | 2.55        | H-1->L+2 (36%),<br>HOMO->L+3 (59%)                      |
|                                                                                       |                                | 479                         | S9    | 0.1149 | 2.58        | H-1->L+3 (88%)                                          |
| <b>MC114</b>                                                                          | 638                            | 817                         | S1    | 0.0532 | 1.51        | H-1->LUMO (85%)                                         |
|                                                                                       |                                | 662                         | S4    | 0.1227 | 1.87        | HOMO->L+1 (85%)                                         |
|                                                                                       |                                | 536                         | S7    | 0.074  | 2.31        | H-3->LUMO (95%)                                         |
|                                                                                       |                                | 492                         | S9    | 0.2416 | 2.51        | H-1->L+2 (25%),<br>HOMO->L+3 (67%)                      |
| <b>MC115</b>                                                                          | 646                            | 832                         | S1    | 0.0456 | 1.48        | H-1->LUMO (87%)                                         |
|                                                                                       |                                | 782                         | S3    | 0.0646 | 1.58        | HOMO->LUMO (89%)                                        |
|                                                                                       |                                | 666                         | S4    | 0.1072 | 1.86        | HOMO->L+1 (89%)                                         |
|                                                                                       |                                | 522                         | S7    | 0.5205 | 2.37        | H-1->L+1 (19%),<br>HOMO->L+2 (64%)                      |
| <b>MC116</b>                                                                          | 654                            | 816                         | S1    | 0.0533 | 1.51        | H-1->LUMO (85%)                                         |
|                                                                                       |                                | 665                         | S4    | 0.1231 | 1.86        | HOMO->L+1 (80%)                                         |
|                                                                                       |                                | 580                         | S6    | 0.0505 | 2.13        | H-2->LUMO (51%),<br>H-1->L+1 (28%),<br>HOMO->LUMO (16%) |
|                                                                                       |                                | 494                         | S10   | 0.2697 | 2.50        | H-1->L+2 (23%),<br>HOMO->L+3 (68%)                      |
| <b>MC117</b>                                                                          | 654                            | 817                         | S1    | 0.0535 | 1.51        | H-1->LUMO (85%)                                         |
|                                                                                       |                                | 660                         | S4    | 0.1238 | 1.87        | HOMO->L+1 (87%)                                         |
|                                                                                       |                                | 519                         | S7    | 0.0533 | 2.38        | H-3->LUMO (97%)                                         |
|                                                                                       |                                | 489                         | S9    | 0.1833 | 2.53        | H-1->L+2 (29%),<br>HOMO->L+3 (64%)                      |
| * The nature of all the calculated transitions mentioned above is of MLCT & LLCT type |                                |                             |       |        |             |                                                         |

Fig. S1. Chemical structures of the new sensitizers MC113-MC117, and N749.

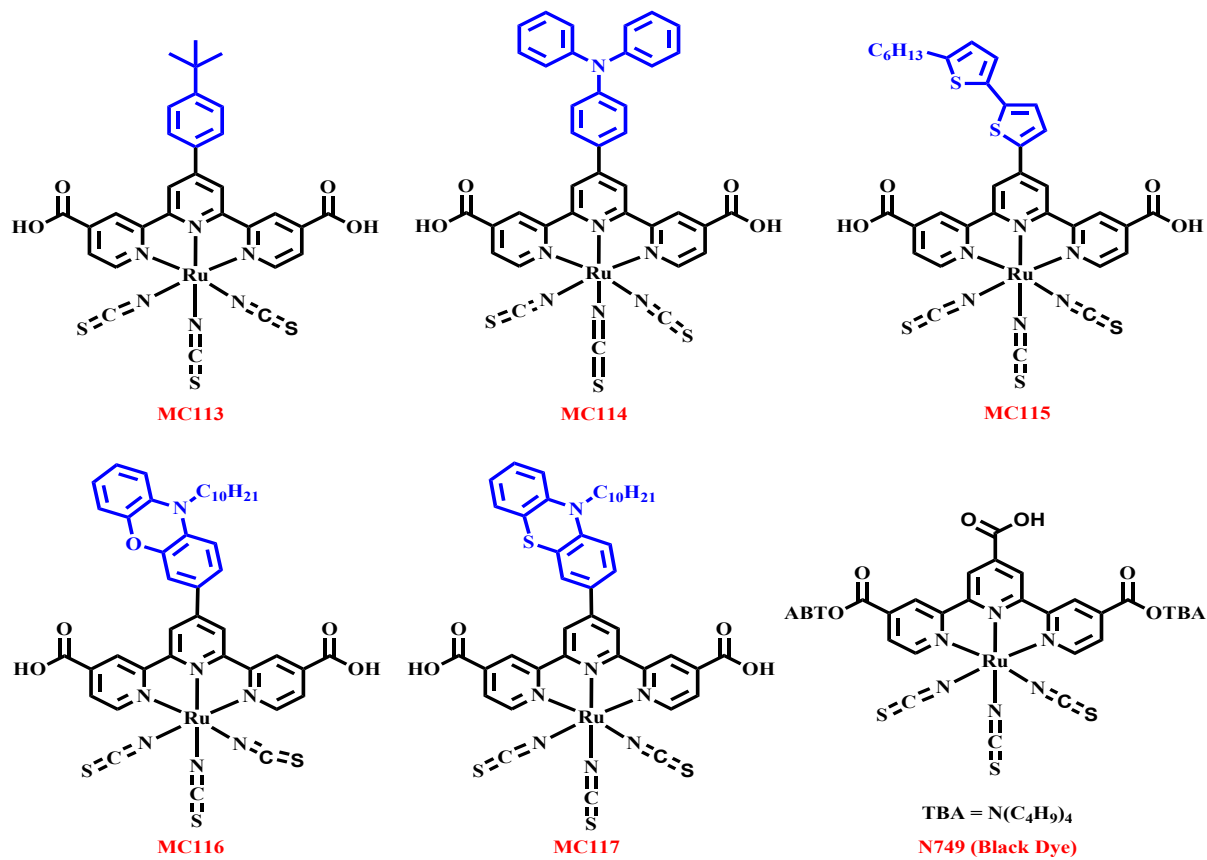

**Fig. S2.** Structures of optimized geometries of **MC113-MC117** at PBE0/ LANL2DZ level, in gas phase

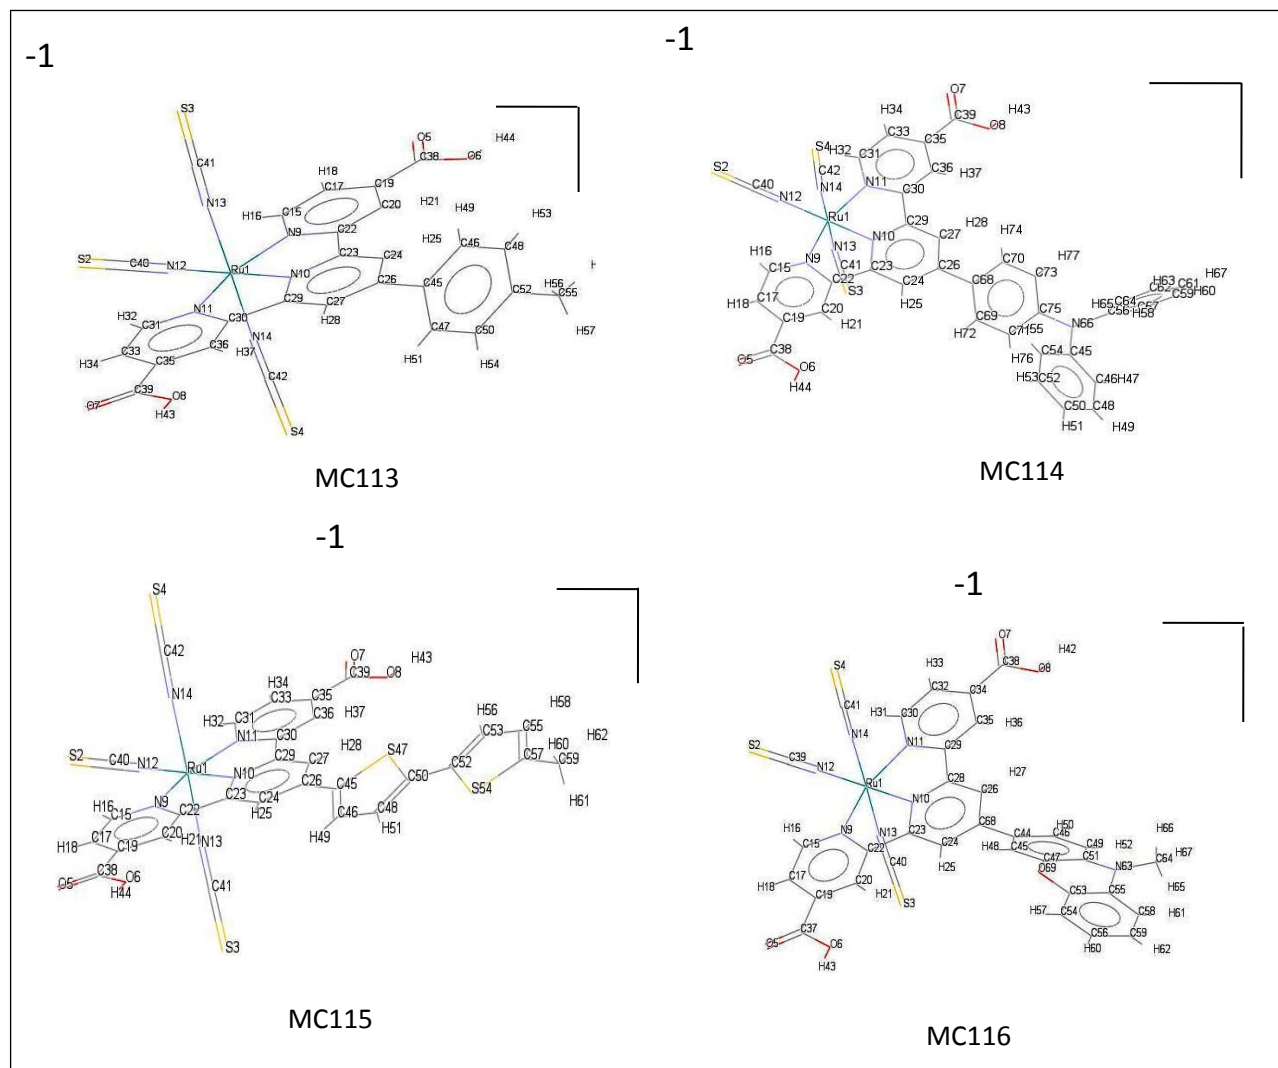

-1

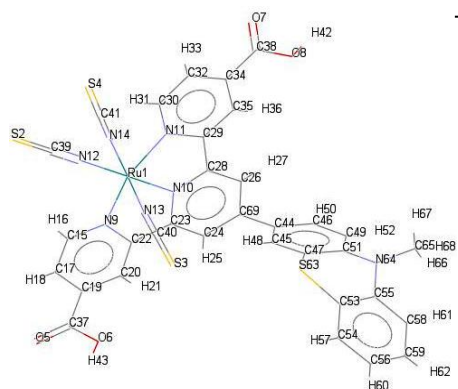

MC117

**Fig. S3 (S3.a-S3.e).** Isodensity plots of **MC113-MC117** (isovalue=0.02) in DMF, with percentage contribution of groups to each molecular orbital, calculated at M06/LANL2DZ level.

| <i>TableS3.a</i>                                                                               | MC113                                                          |
|------------------------------------------------------------------------------------------------|----------------------------------------------------------------|
| 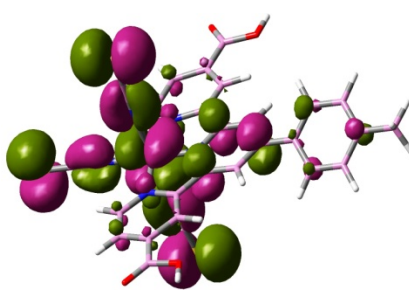<br>HOMO    | Ru (41%)<br>NCS (43%)<br>Terpyridine (14%)<br>Chromophore (2%) |
| <br>LUMO   | Ru (7%)<br>NCS (2%)<br>Terpyridine (90%)<br>Chromophore (1%)   |
| <br>HOMO-1  | Ru (43%)<br>NCS (45%)<br>Terpyridine (12%)<br>Chromophore (0%) |
| <br>LUMO+1 | Ru (8%)<br>NCS (1%)<br>Terpyridine (91%)<br>Chromophore (0%)   |

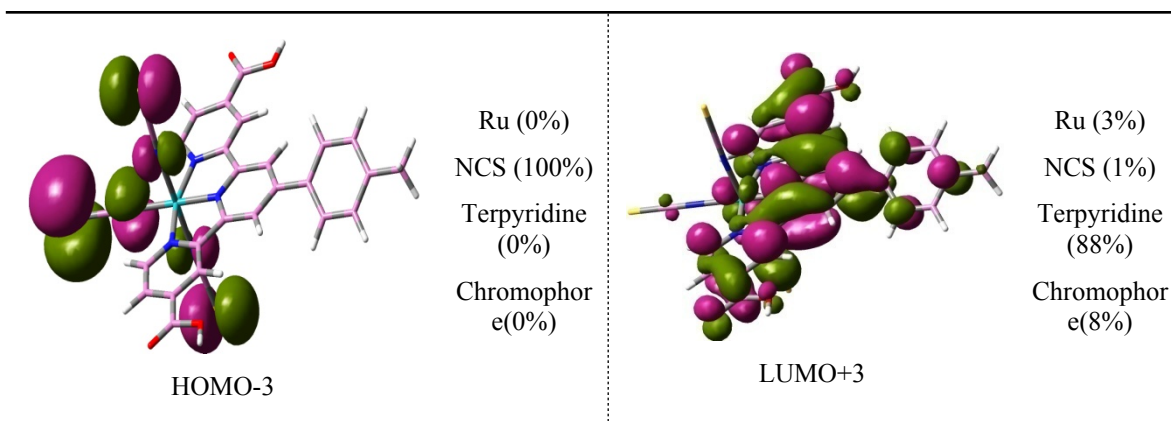

*TableS3.b* MC114

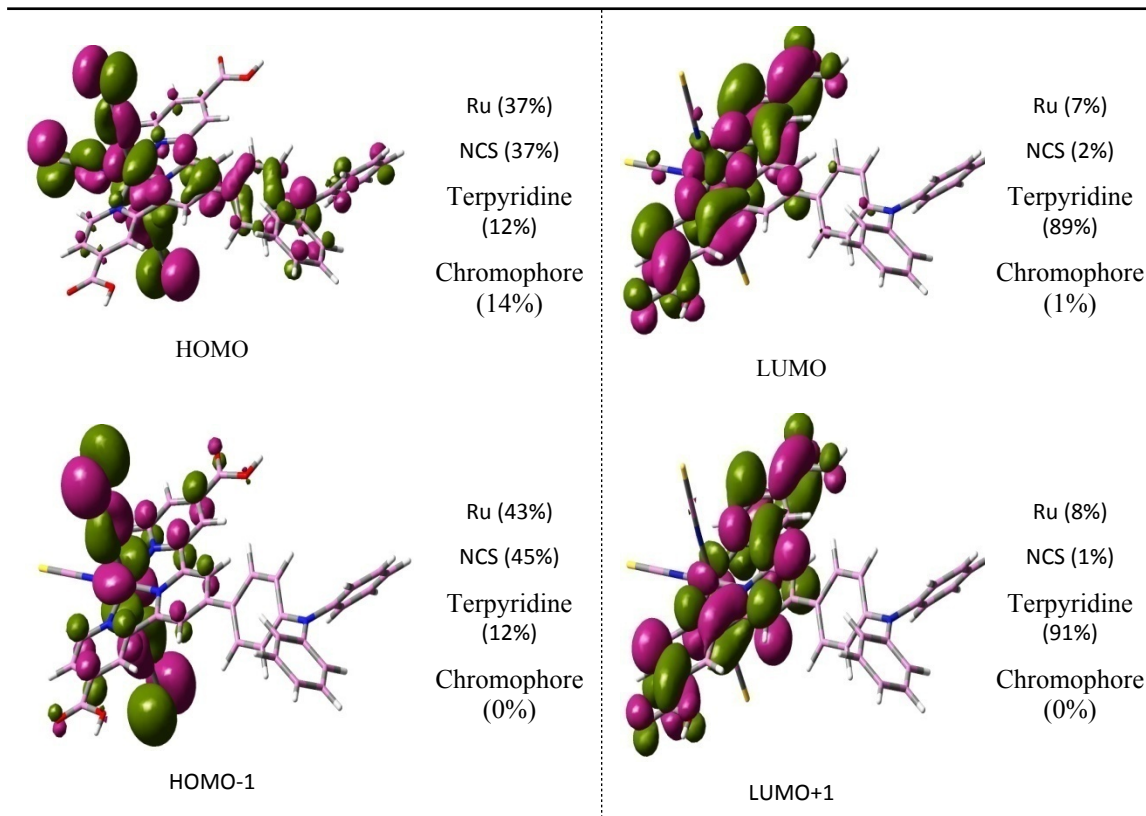

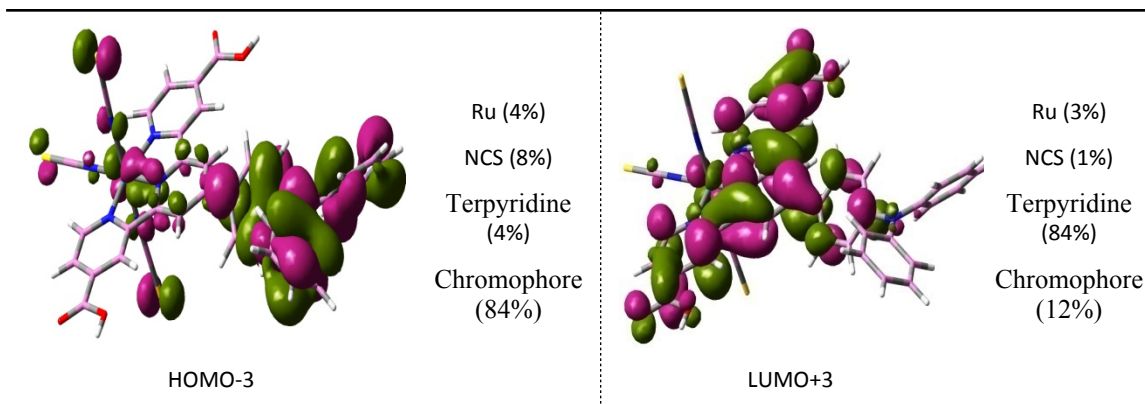

*TableS3.c* MC115

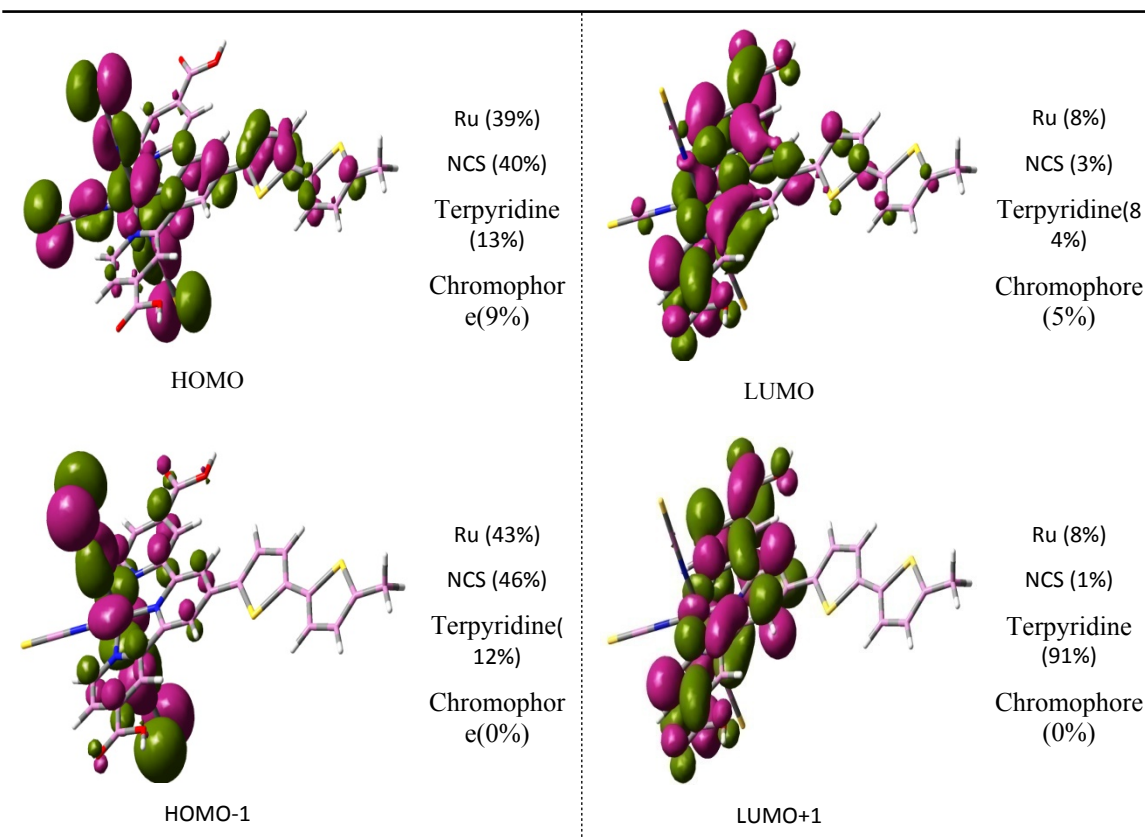



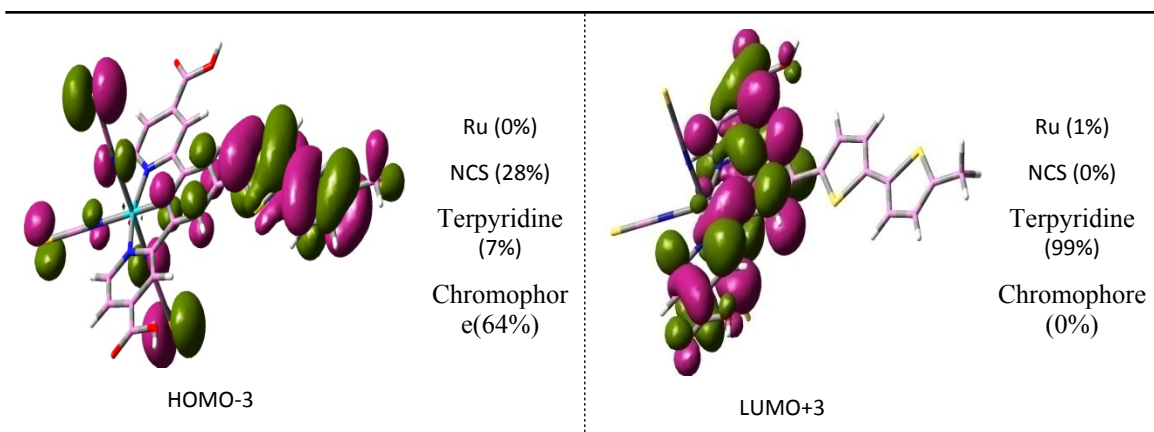

**TableS3.d MC116**

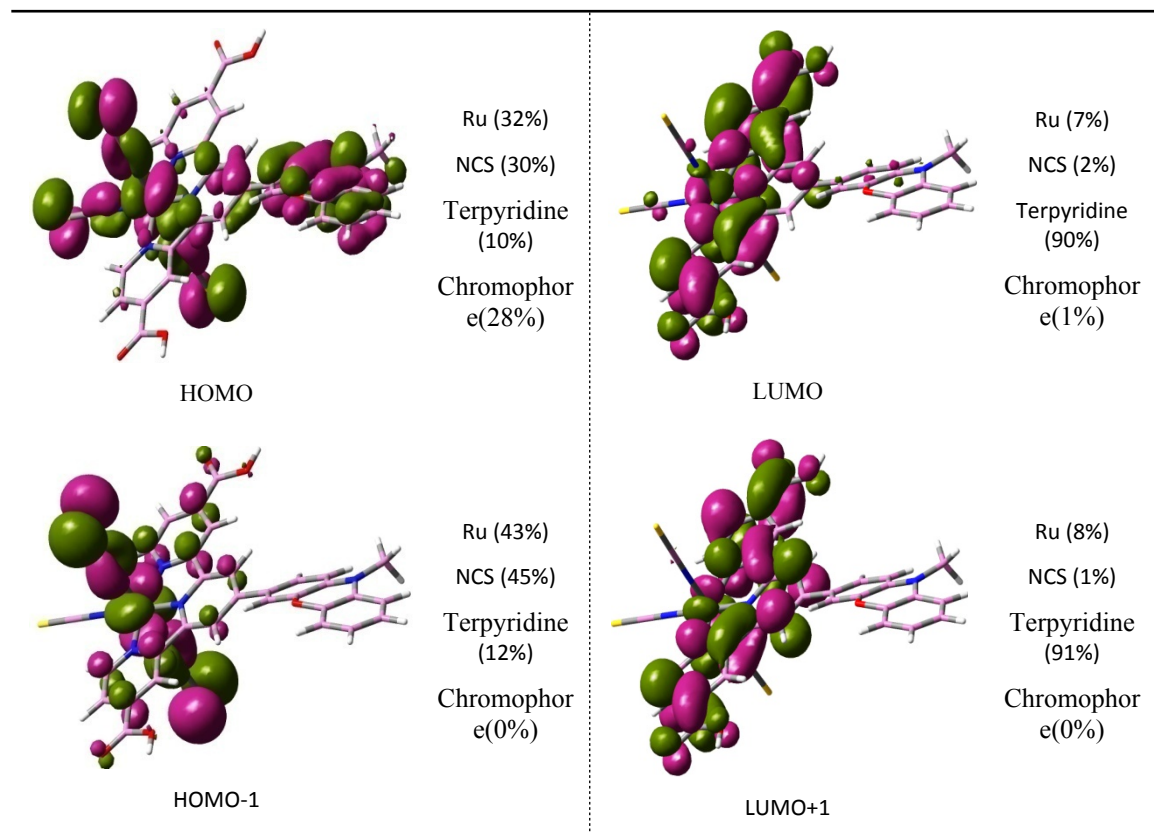

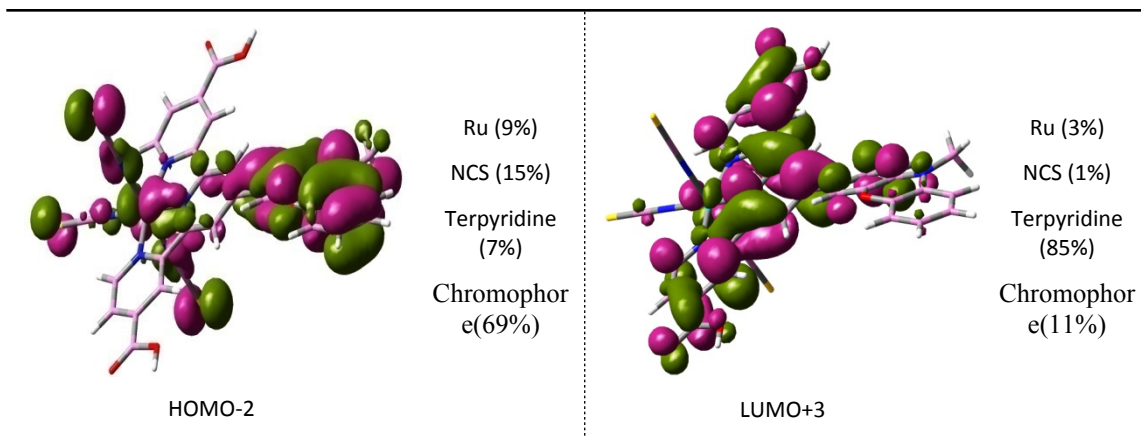

*TableS3.e* MC117

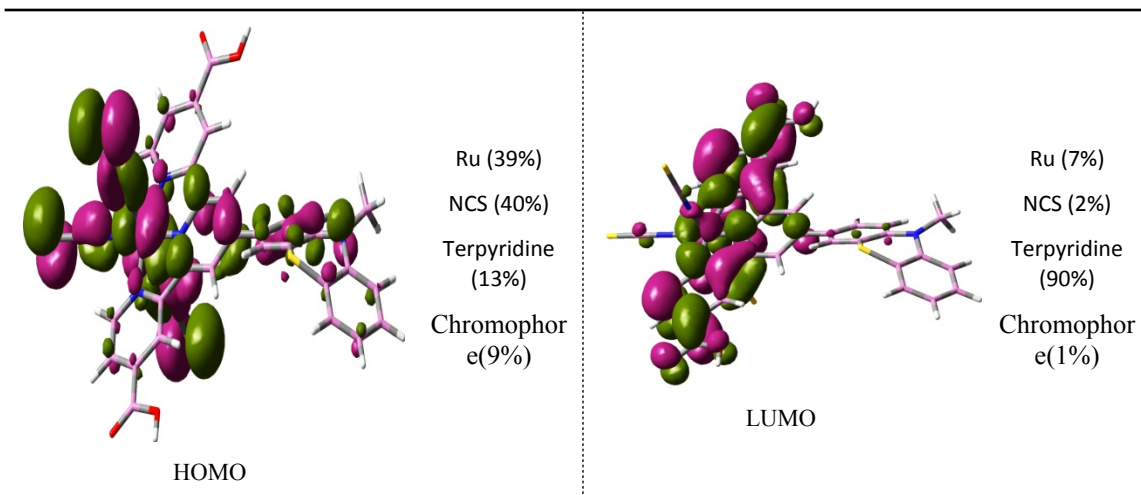

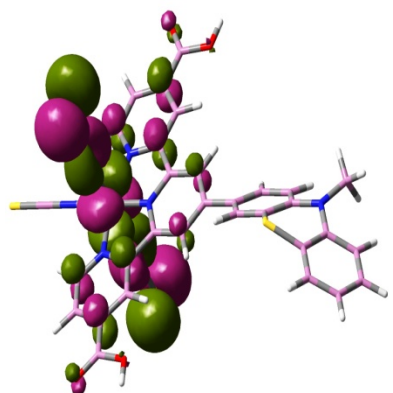

HOMO-1

Ru (42%)  
NCS (45%)  
Terpyridine (12%)  
Chromophore (0%)

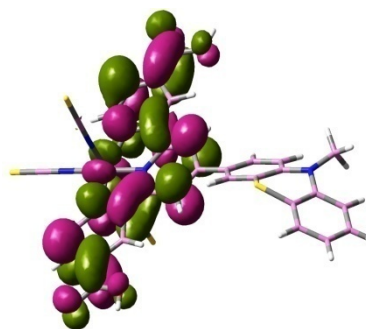

LUMO+1

Ru (8%)  
NCS (1%)  
Terpyridine (91%)  
Chromophore (2%)

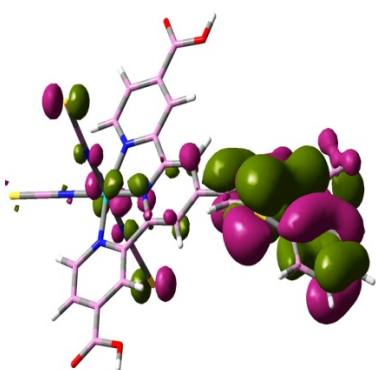

HOMO-3

Ru (2%)  
NCS (5%)  
Terpyridine (3%)  
Chromophore (89%)

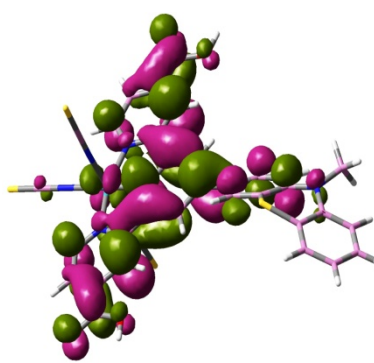

LUMO+3

Ru (3%)  
NCS (1%)  
Terpyridine (85%)  
Chromophore (11%)

**Fig. S4.** Normalized plots of simulated and experimental UV-Vis spectra of **MC113-MC117**. The green vertical bars correspond to the Oscillator strengths of calculated singlet excited states.

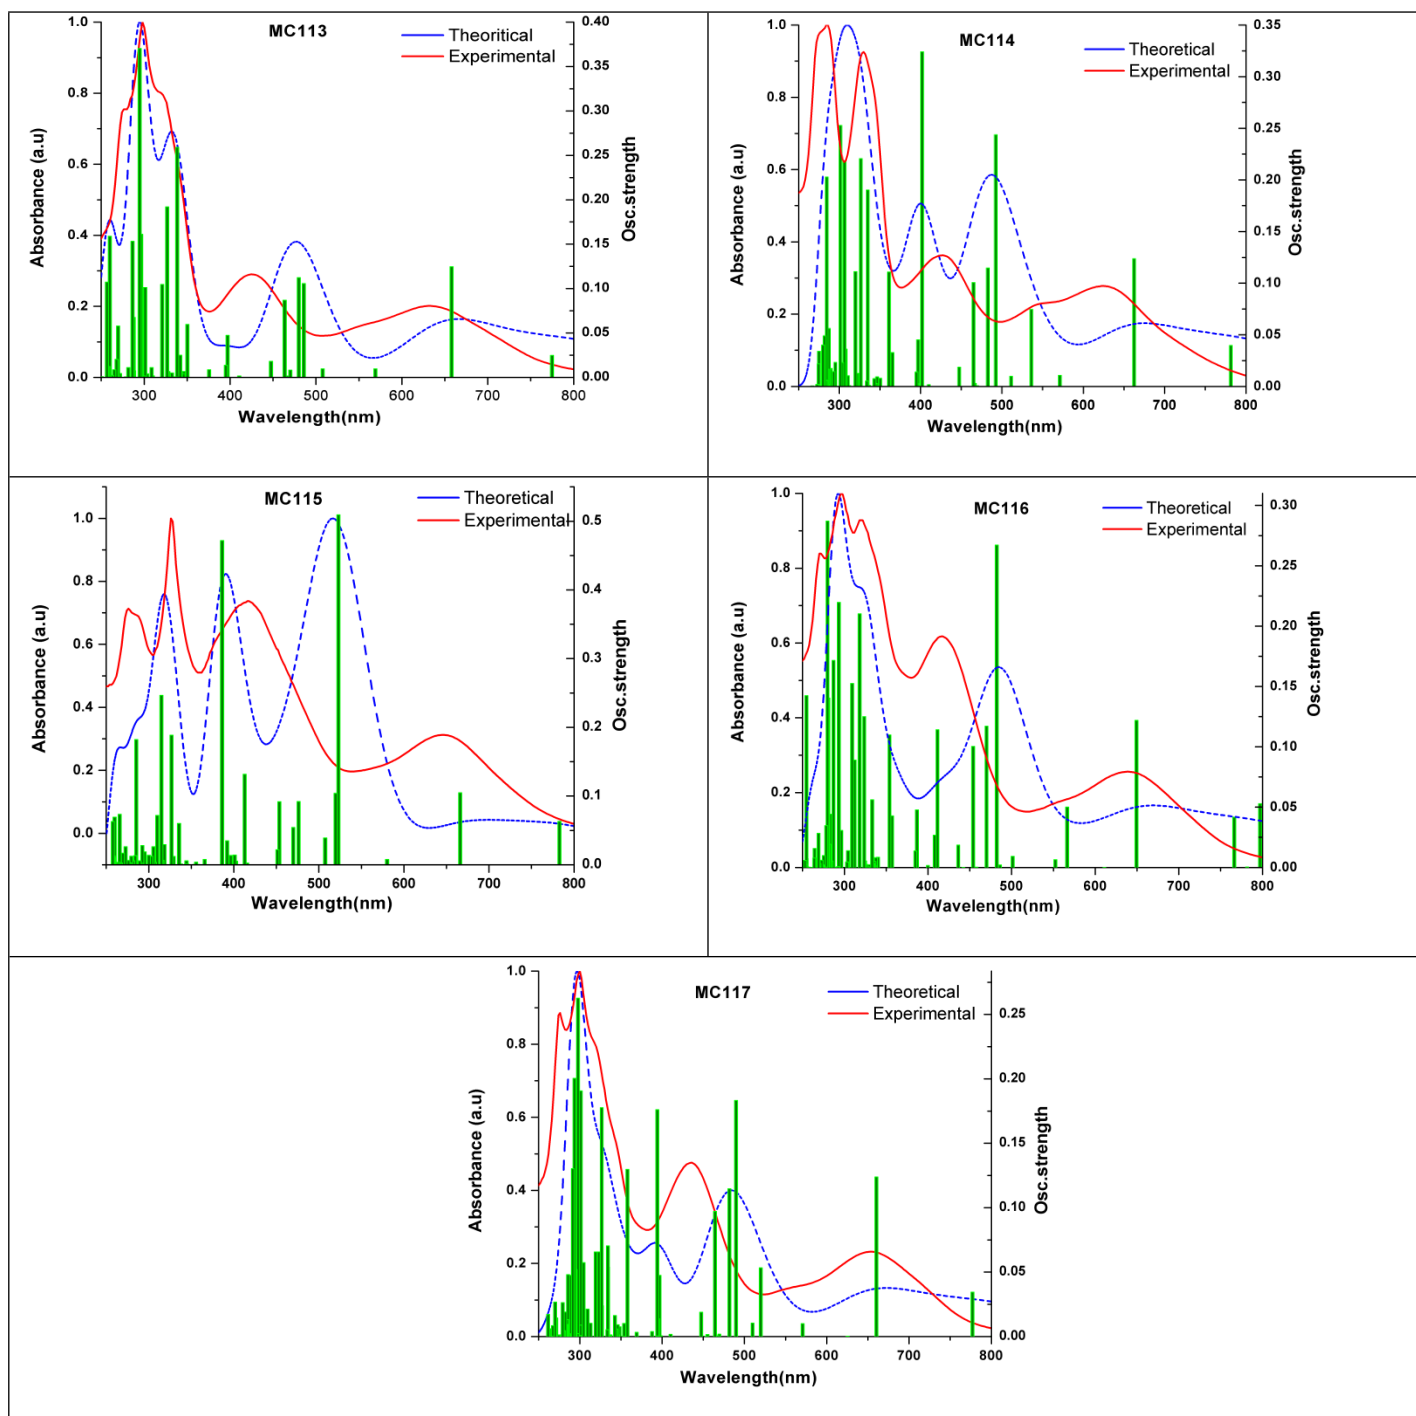

Supplement: c4dt01598c1.pdf [file c4dt01598c1.pdf]
